# Supplementary material for: Pressure-constrained sonication activation of flexible printed metal circuit
Source: Springer Nature journal article supplement (doi:10.1038/s41467-024-52873-7), 2024-09-27
Supplement: 41467_2024_52873_MOESM3_ESM.pdf [file 41467_2024_52873_MOESM3_ESM.pdf]

## **Description of Additional Supplementary Files**

**Supplementary Movie 1** | The PCSA equipment and activating the printed Cu-particle circuit at room temperature

**Supplementary Movie 2** | Temperature-stimulated memory function of the printed NiTi film activated by the PCSA

**Supplementary Movie 3** | The PCSA integrated with the roll-to-roll process for large-scale production

**Supplementary Movie 4** | The coated polymer for suppressing particle segregation in the sonication vibration

**Supplementary Movie 5** | Simulation results of vibration-induced particle interaction

**Supplementary Movie 6** | Real-time observation of the particle microstructure densification evolution

**Supplementary Movie 7** | The PCSA for joining electronic components onto the printed circuits without solder

**Supplementary Movie 8** | The printed BiInSnZn electrode with healing capacity through heat softening

**Supplementary Movie 9** | The 3D origami-structured electronics folded into various types of structures

**Supplementary Movie 10** | The intelligent paper plane

**Supplementary Movie 11** | Erasable and foldable double-sided electroluminescent

**Supplementary Movie 12** | Electroluminescent display on cloth
